# Supplementary material for: Concentration dependent ratiometric turn-on selective fluorescence detection of picric acid in aqueous and non-aqueous media
Source: Royal Society of Chemistry journal article supplement (doi:10.1039/c4ra15207g), 2014-12-01
Supplement: c4ra15207g1.pdf [file c4ra15207g1.pdf]

# **Concentration dependent ratiometric turn-on selective fluorescence detection of picric acid in aqueous and non-aqueous media**

Ashok Yadav and Ramamoorthy Boomishankar\*

*Department of Chemistry, Mendeleev Block, Indian Institute of Science Education and Research (IISER), Pune, Dr. Homi Bhabha Road, Pune – 411008, India.*

*Fax: +912025908186; E-mail: [boomi@iiserpune.ac.in](mailto:boomi@iiserpune.ac.in)*

**Table S1:** Crystal data table

| Compound                               | TAQP.3H <sub>2</sub> O                                          |
|----------------------------------------|-----------------------------------------------------------------|
| Chemical formula                       | C <sub>27</sub> H <sub>27</sub> N <sub>6</sub> O <sub>4</sub> P |
| Formula weight                         | 530.52                                                          |
| Temperature                            | 100(2)K                                                         |
| Crystal system                         | Hexagonal                                                       |
| Space group                            | P-3                                                             |
| a (Å); α (°)                           | 16.08(2); 90°                                                   |
| b (Å); β (°)                           | 16.08(2); 90°                                                   |
| c (Å); γ (°)                           | 6.269(8); 120°                                                  |
| V (Å <sup>3</sup> ); Z                 | 1404(3); 2                                                      |
| ρ (calc.) mg m <sup>-3</sup>           | 1.255                                                           |
| μ(Mo K <sub>α</sub> ) mm <sup>-1</sup> | 0.140                                                           |
| 2θ <sub>max</sub> (°)                  | 56                                                              |
| R(int)                                 | 0.1479                                                          |
| Completeness to θ                      | 95.6 %                                                          |
| Data / param.                          | 2194 / 121                                                      |
| GOF                                    | 1.082                                                           |
| R1 [F>4σ(F)]                           | 0.0863                                                          |
| wR2 (all data)                         | 0.2874                                                          |
| max. peak/hole (e.Å <sup>-3</sup> )    | 0.733/ -0.432                                                   |

**Table S2:** Selected bond-lengths and angles for TAQP.3H<sub>2</sub>O

| Compound | Bond length          | Bond angle                    |
|----------|----------------------|-------------------------------|
| TAQP     | P(1)-O(1) 1.504(5)   | O(1)-P(1)-N(1)#1 112.56(12)   |
|          | P(1)-N(1)#1 1.658(4) | O(1)-P(1)-N(1)#2 112.56(12)   |
|          | P(1)-N(1)#2 1.658(4) | N(1)#1-P(1)-N(1)#2 106.22(14) |
|          | P(1)-N(1) 1.658(4)   | O(1)-P(1)-N(1) 112.56(12)     |
|          |                      | N(1)#1-P(1)-N(1) 106.22(14)   |
|          |                      | N(1)#2-P(1)-N(1) 106.22(14)   |
|          |                      |                               |

**Table S3:** H-bonding table for TAQP.3H<sub>2</sub>O

| Compound | D-H...A                                                             | d(H...A) Å | d(D...A) Å | <(DHA)° |
|----------|---------------------------------------------------------------------|------------|------------|---------|
| TAQP     | N(1)-H(1)...O(1S)#3                                                 | 0.88       | 2.876(5)   | 154.5   |
|          | O(1S)-H(1S)...N(13)#4                                               | 0.88(4)    | 2.938(5)   | 177(6)  |
|          | O(1S)-H(2S)...O(1)                                                  | 0.88(4)    | 2.887(5)   | 167(6)  |
|          | #1 -y+1,x-y,z #2 -x+y+1,-x+1,z #3 -x+y+1,-x+1,z-1<br>#4 y,-x+y,-z+1 |            |            |         |

**Scheme S1:**

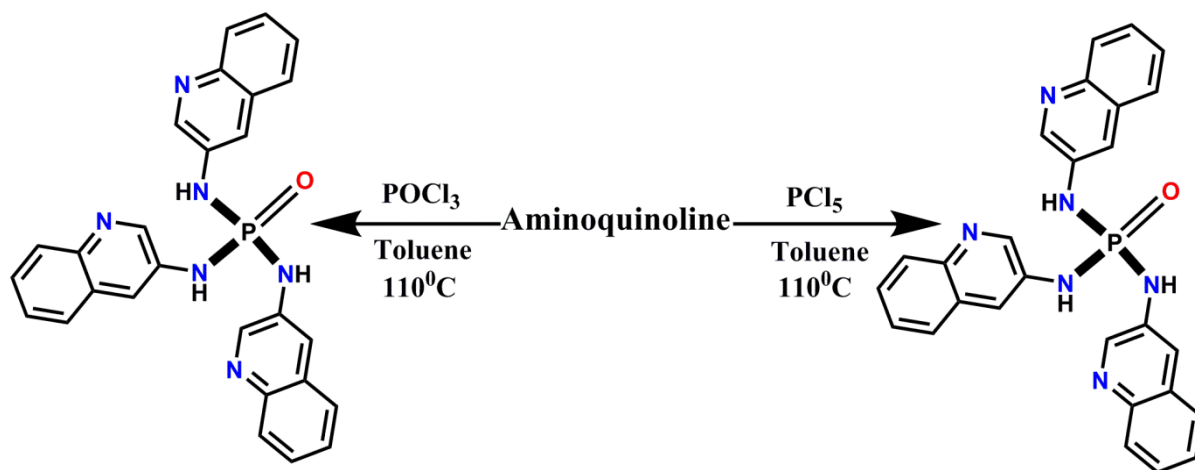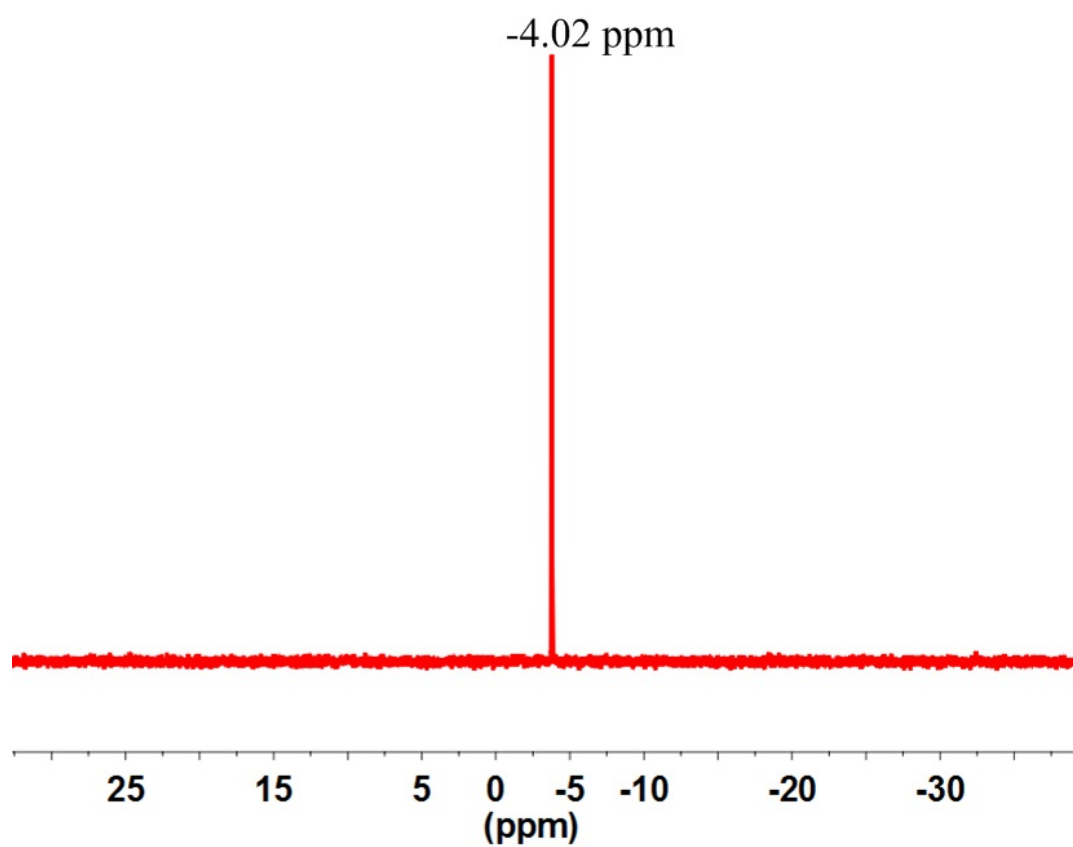

Fig. S1:  $^{31}\text{P}$ -NMR of TAQP in  $\text{DMSO-d}_6$

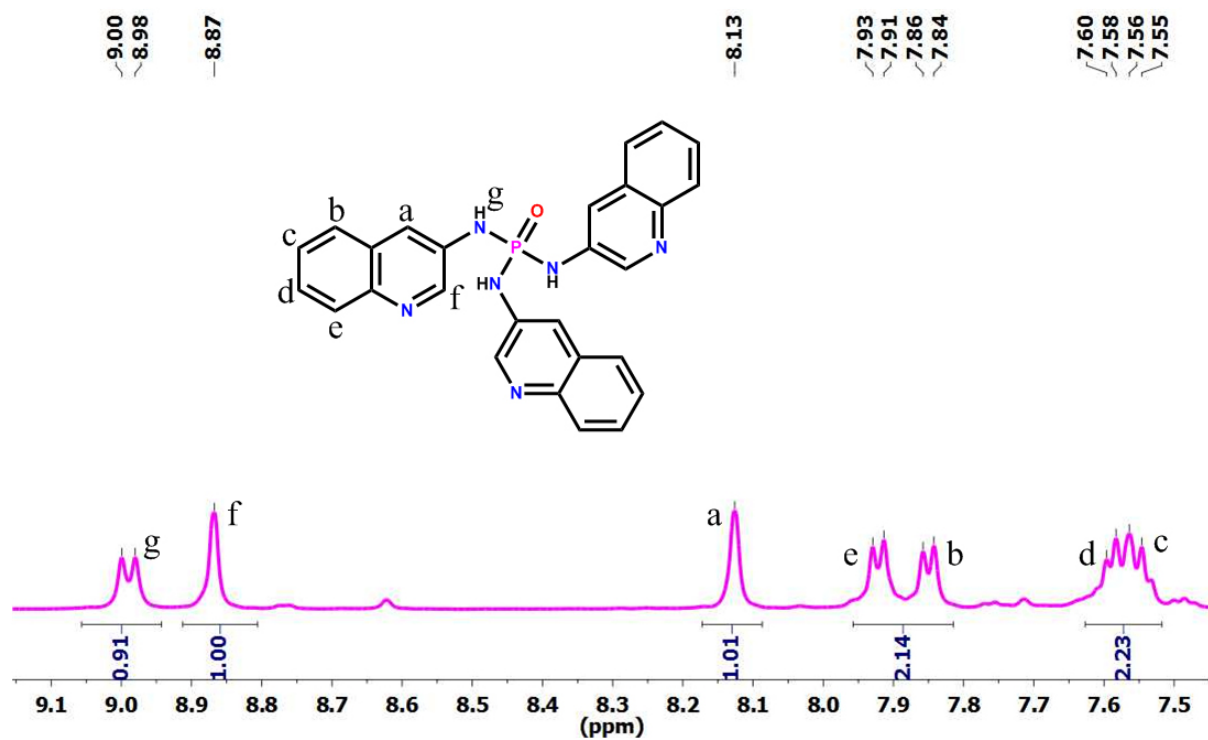

Fig. S2: <sup>1</sup>H-NMR of TAQP in DMSO-d<sub>6</sub>

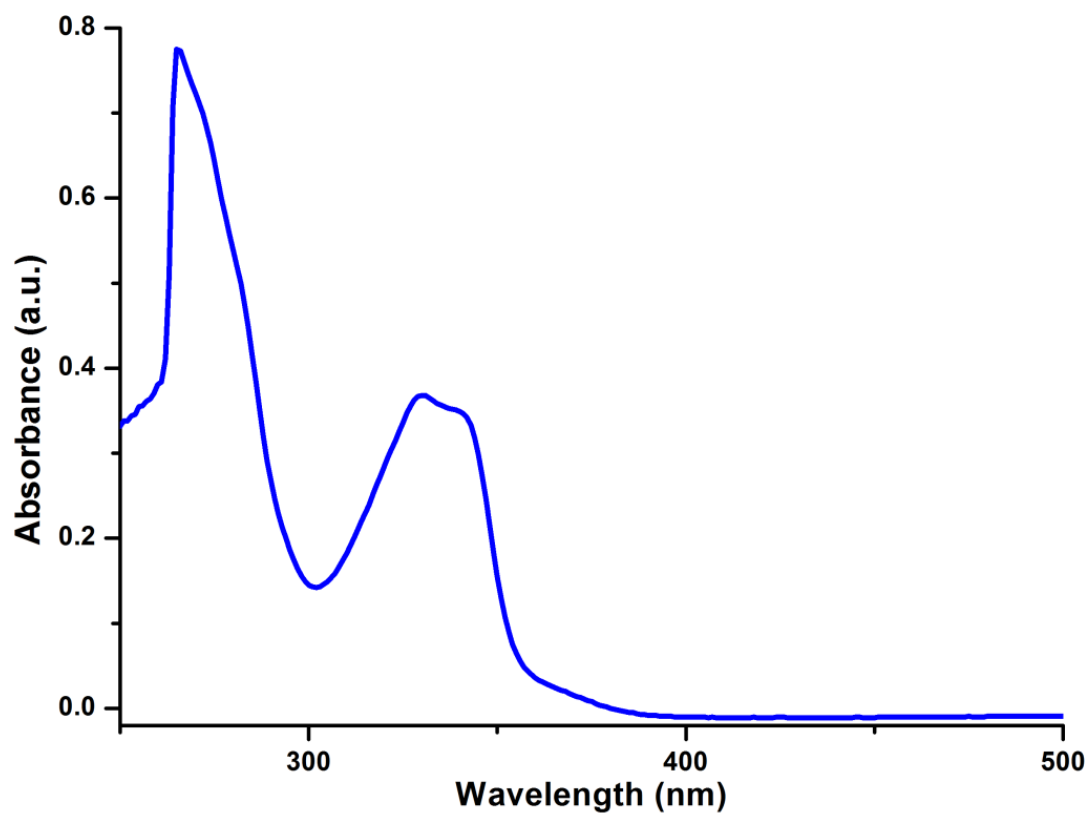

Fig. S3: Absorbance spectra of TAQP in DMF.

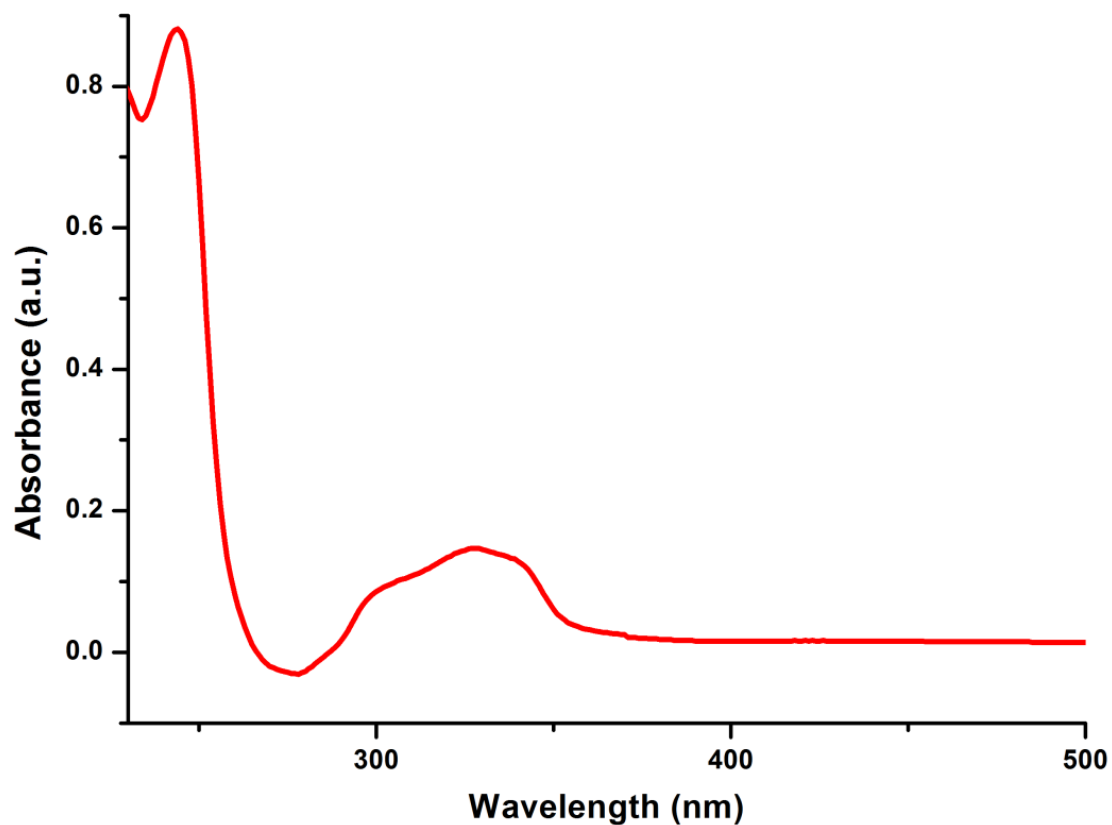

Fig. S4: Absorbance spectra of TAQP in MeOH.

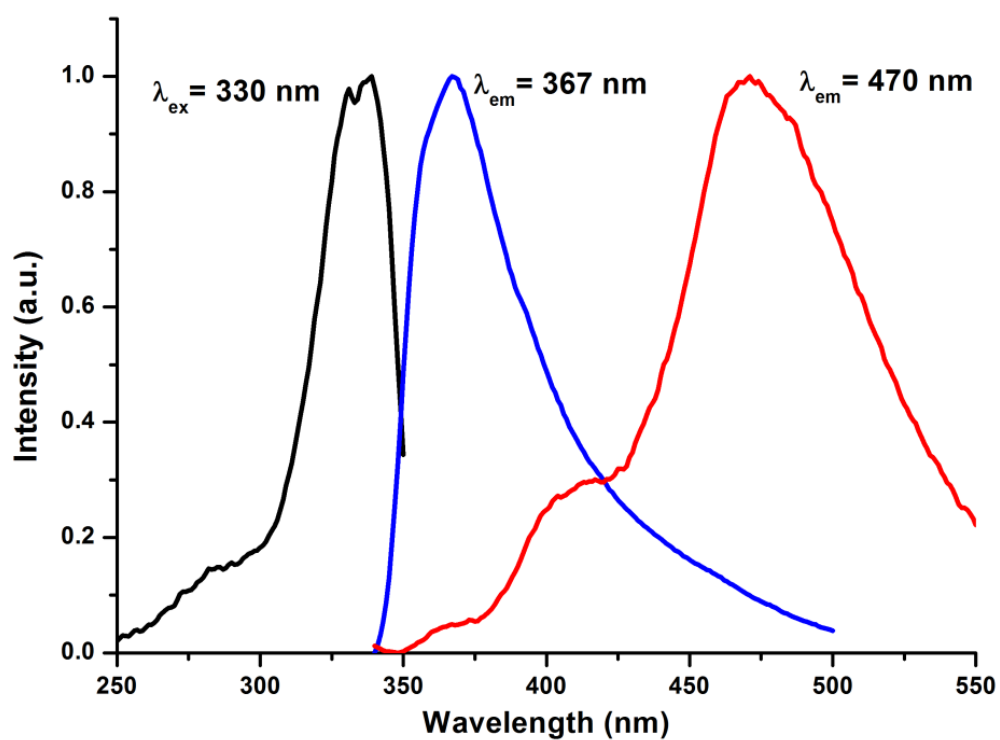

Fig. S5: Excitation and emission Spectra of TAQP in DMF: excitation spectra (black), emission at  $1 \times 10^{-3}$  M concentration (blue) and emission at higher concentration  $1 \times 10^{-3}$  M (red).

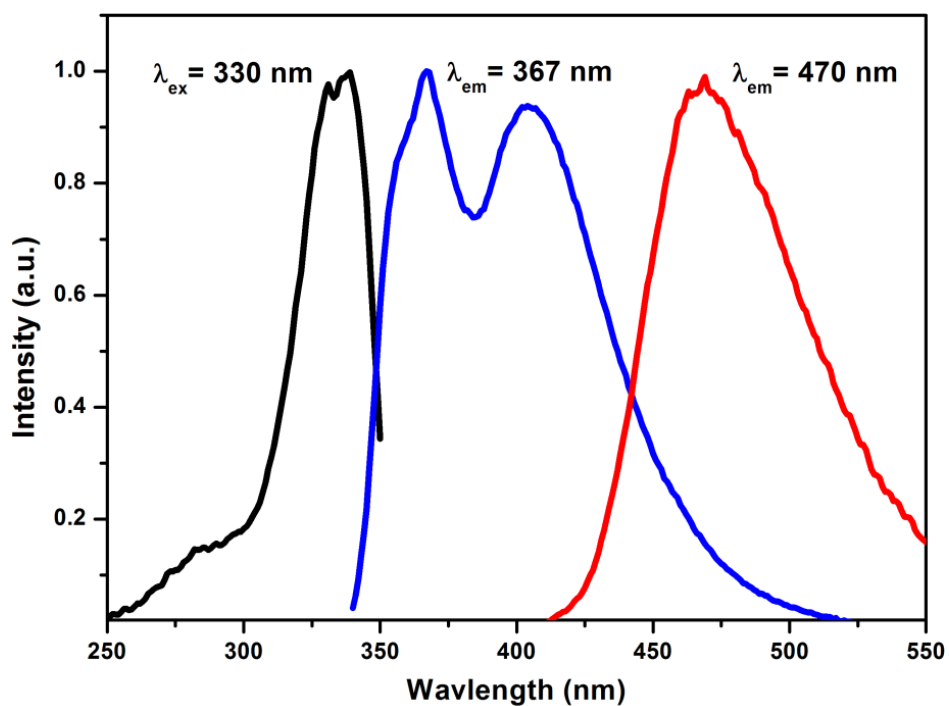

**Fig. S6:** Excitation and emission Spectra of TAQP in MeOH: excitation spectra (black), emission at  $1 \times 10^{-5} \text{M}$  concentration (blue) and emission at higher concentration  $1 \times 10^{-3} \text{M}$  (red).

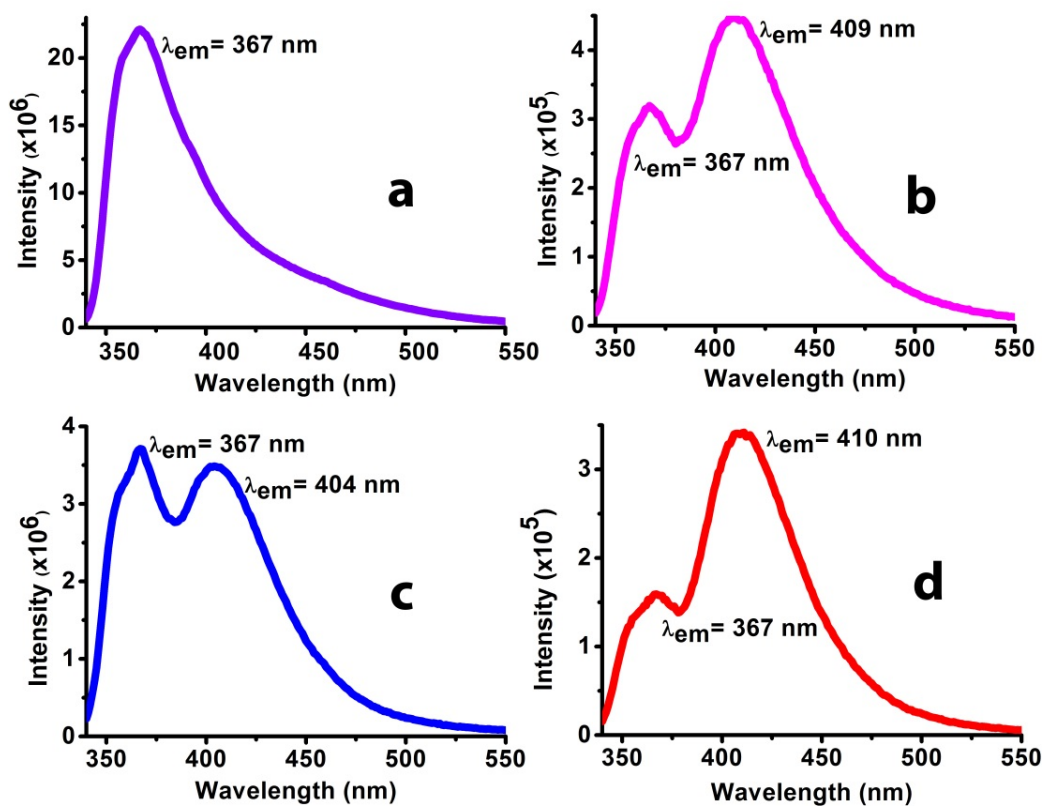

**Fig. S7:** Emission Spectra of TAQP in various solvents at  $1 \times 10^{-5} \text{M}$  concentration: DMF (green), DMF/ $\text{H}_2\text{O}$  (pink), MeOH (blue) and MeOH/ $\text{H}_2\text{O}$  (red).

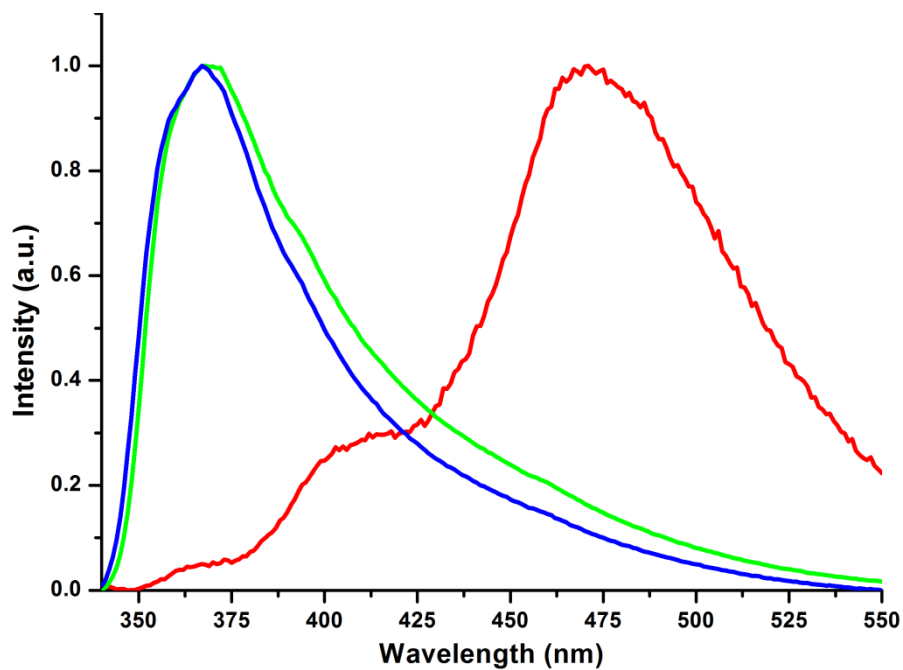

**Fig. S8:** Emission spectra of TAQP in DMF at different concentration:  $1 \times 10^{-3} \text{M}$  (red),  $1 \times 10^{-4} \text{M}$  (green),  $1 \times 10^{-5} \text{M}$  (blue).

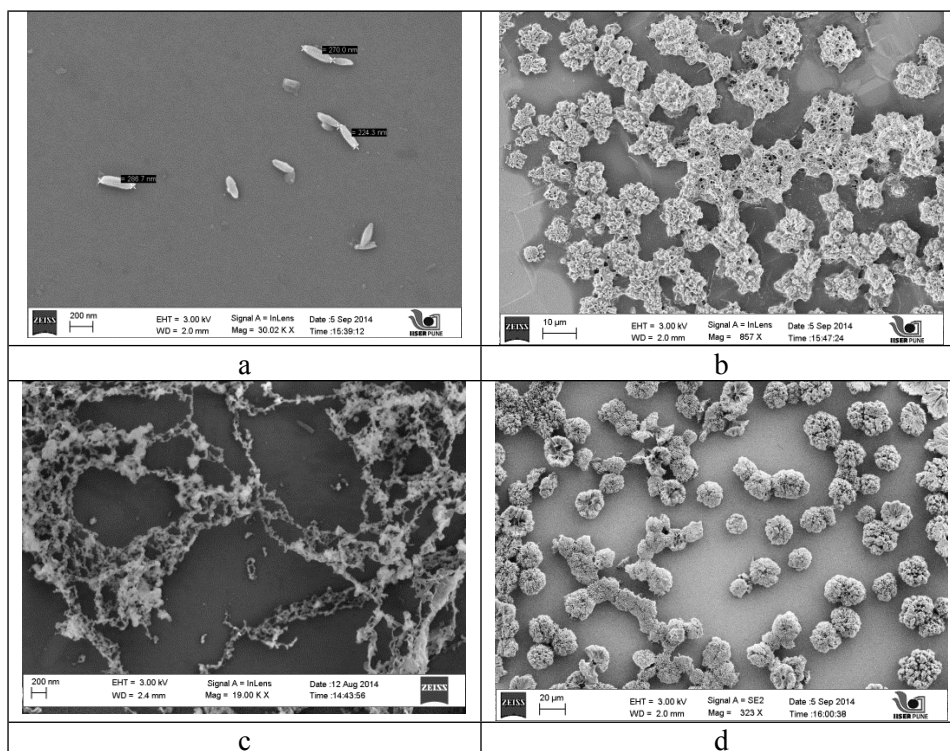

**Fig. S9:** FESEM images of  $1 \times 10^{-5} \text{M}$  solution of TAQP in DMF (a), DMF/ $\text{H}_2\text{O}$  (b), MeOH (c) and MeOH/ $\text{H}_2\text{O}$  (d).

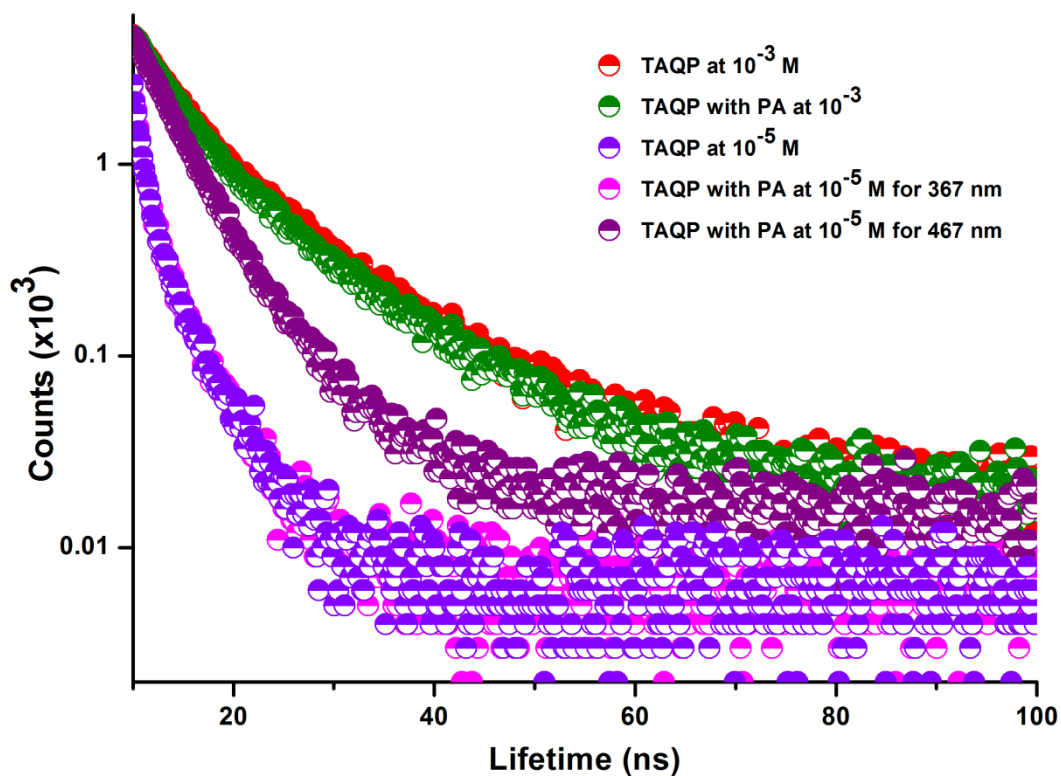

Fig. S10: Fluorescence Lifetime spectra of various samples of TAQP.

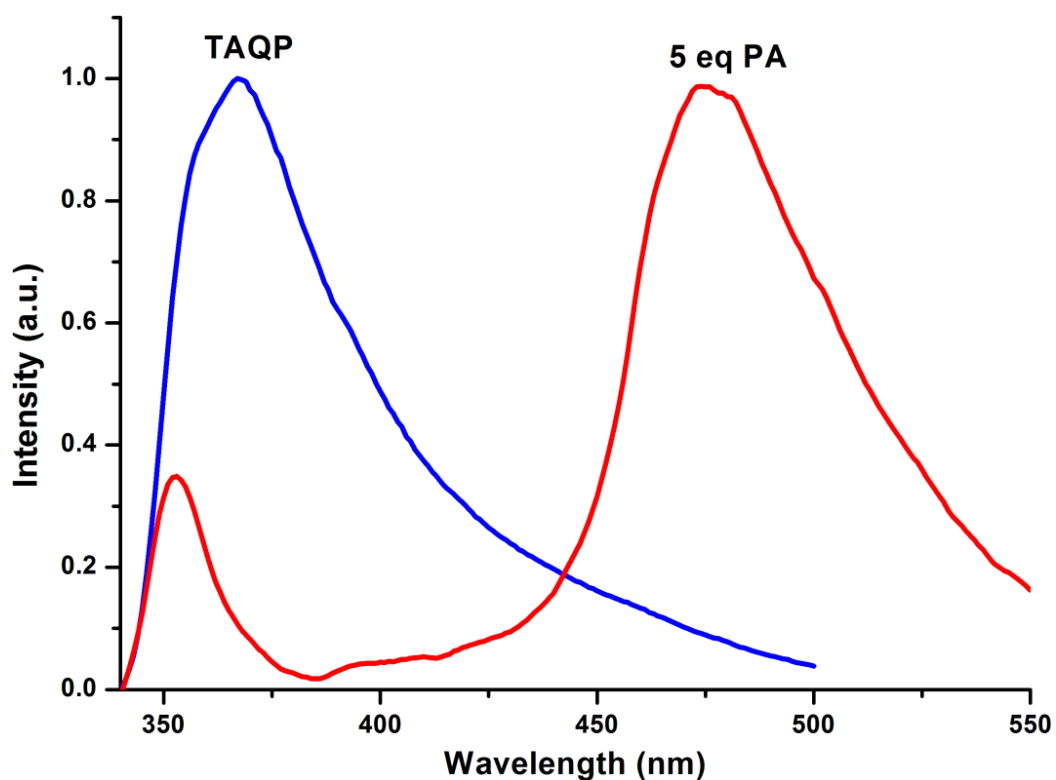

Fig. S11: Emission spectra of TAQP ( $1 \times 10^{-5}$  M) before (blue) and after (red) the addition of 5 eq PA ( $1 \times 10^{-3}$  M) in DMF.



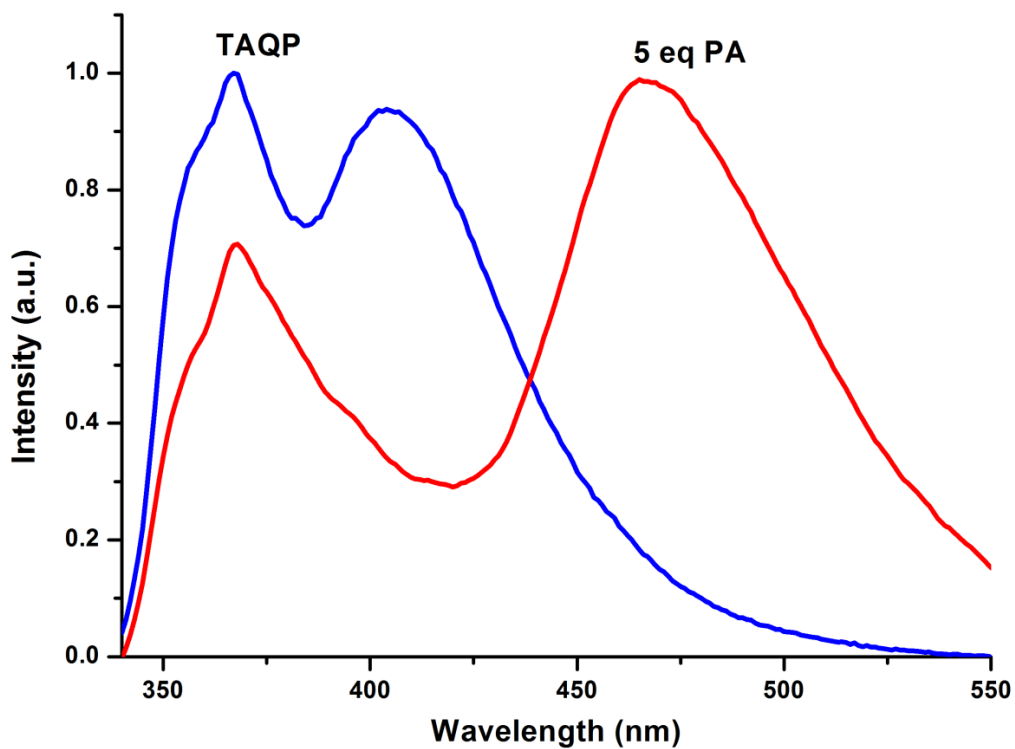

Fig. S12: Emission spectra of TAQP ( $1 \times 10^{-5} \text{M}$ ) before (blue) and after (red) the addition of 5 eq PA ( $1 \times 10^{-3} \text{M}$ ) in MeOH.

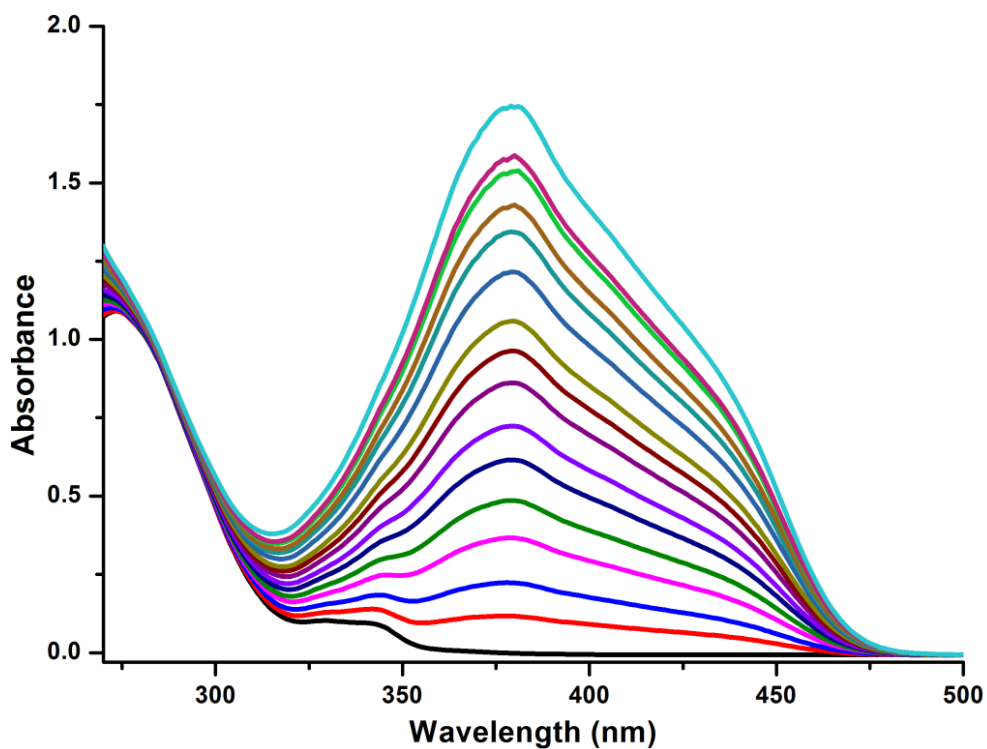

Fig. S13: Absorbance spectra of TAQP ( $1 \times 10^{-5} \text{M}$ ) in DMF with PA ( $1 \times 10^{-3} \text{M}$ )

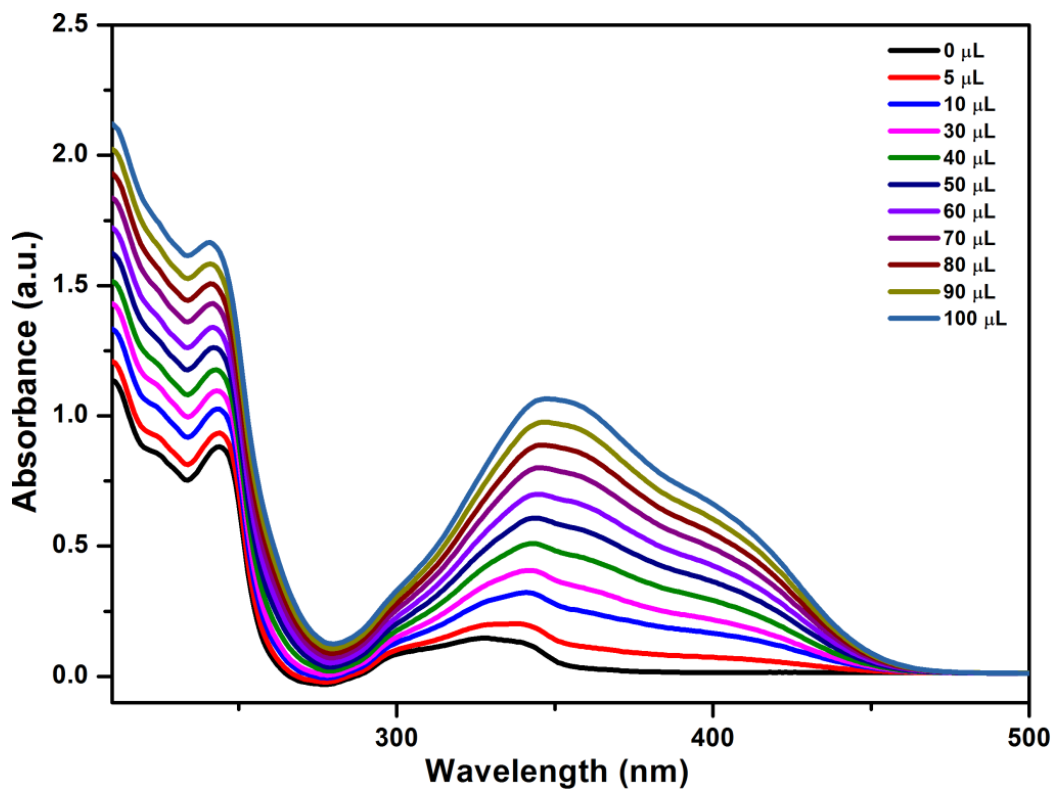

Fig. S14: Absorbance spectra of TAQP ( $1 \times 10^{-5} \text{M}$ ) in MeOH with PA ( $1 \times 10^{-3} \text{M}$ )

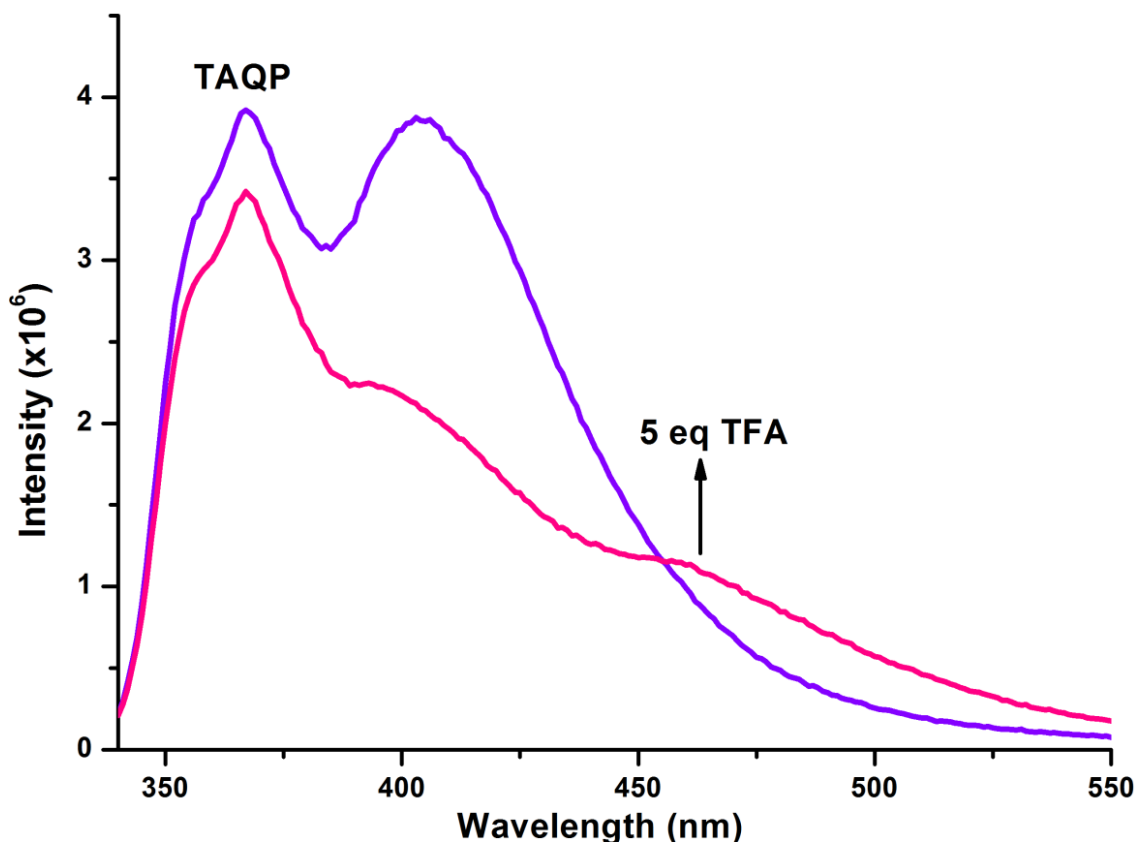

Fig. S15: Emission spectra of TAQP ( $1 \times 10^{-5} \text{M}$ ) before (purple) and after (red) the addition of TFA ( $1 \times 10^{-3} \text{M}$ ) in MeOH.

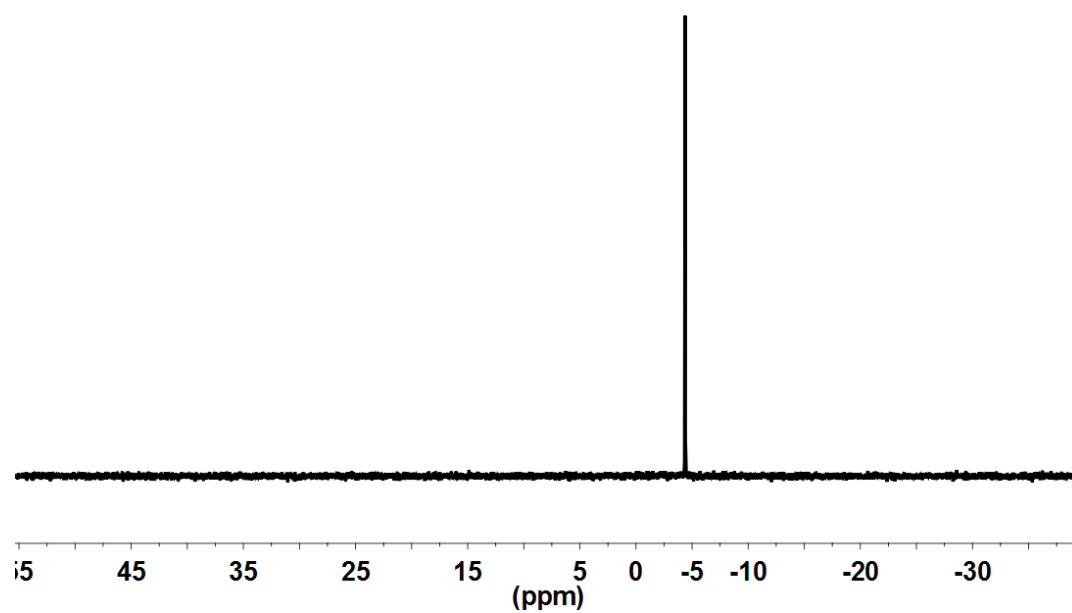

**Fig. S16:**  $^{31}\text{P}$ -NMR of TAQP + 5 eq PA in  $\text{DMSO-d}_6$ .

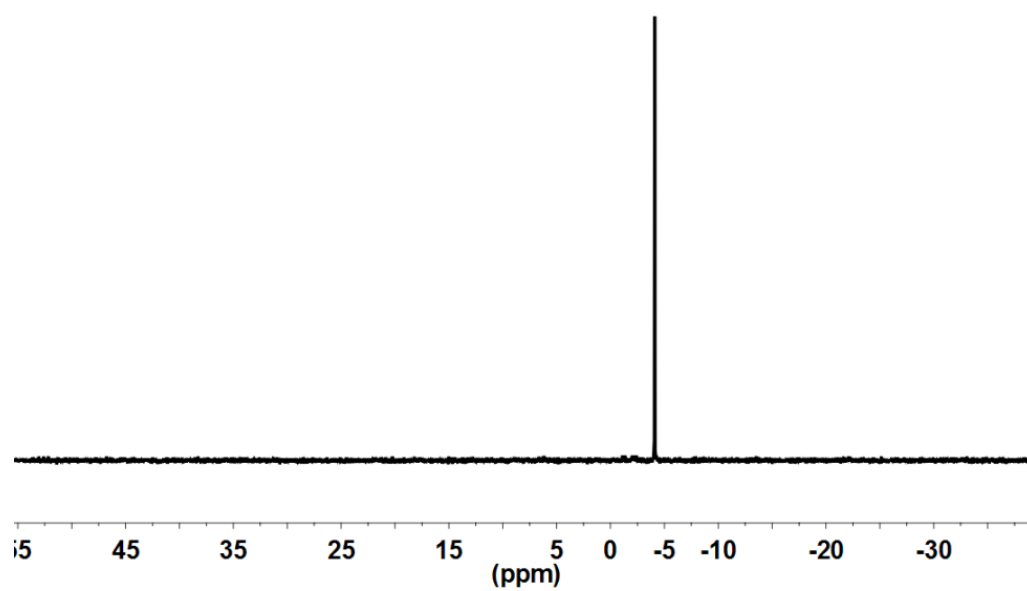

**Fig. S17:**  $^{31}\text{P}$ -NMR of TAQP + 10 eq TFA in  $\text{DMSO-d}_6$ .

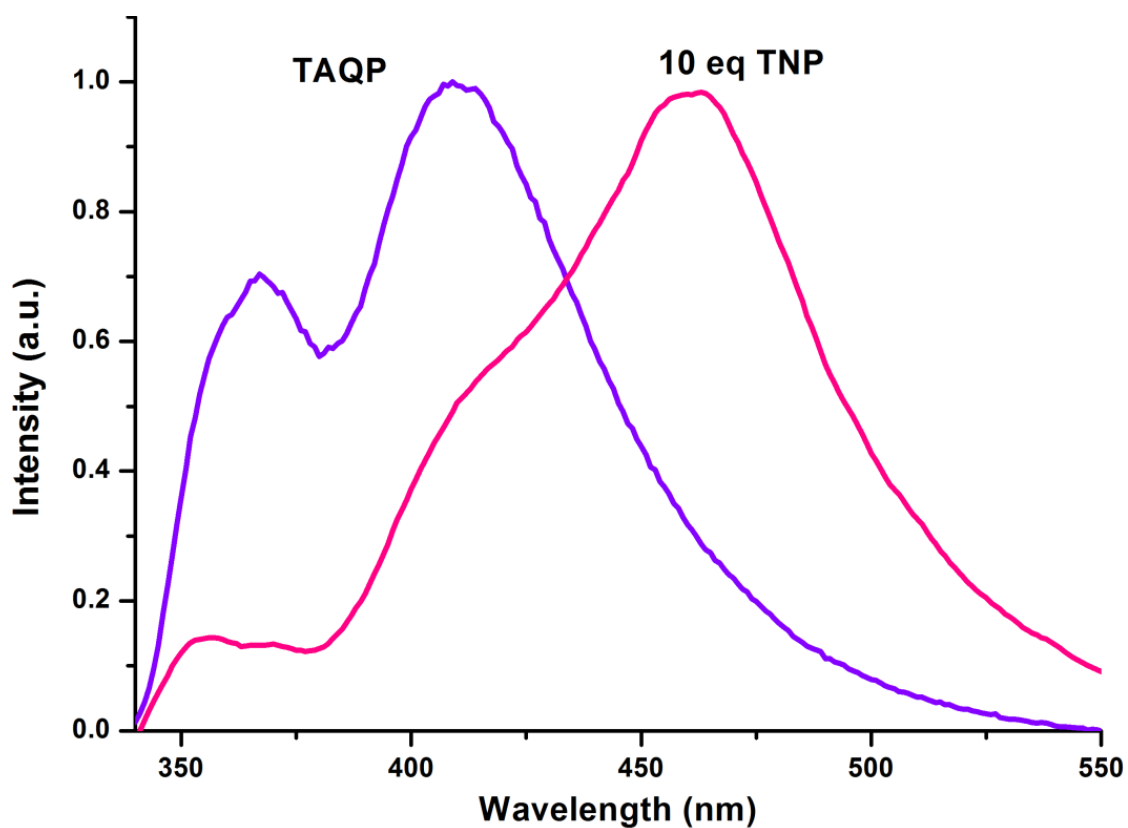

**Fig. S18:** Emission spectra of TAQP ( $1 \times 10^{-5} \text{M}$ ) before (purple) and after (red) the addition of 10 eq PA ( $1 \times 10^{-3} \text{M}$ ) in DMF:H<sub>2</sub>O (6:4).

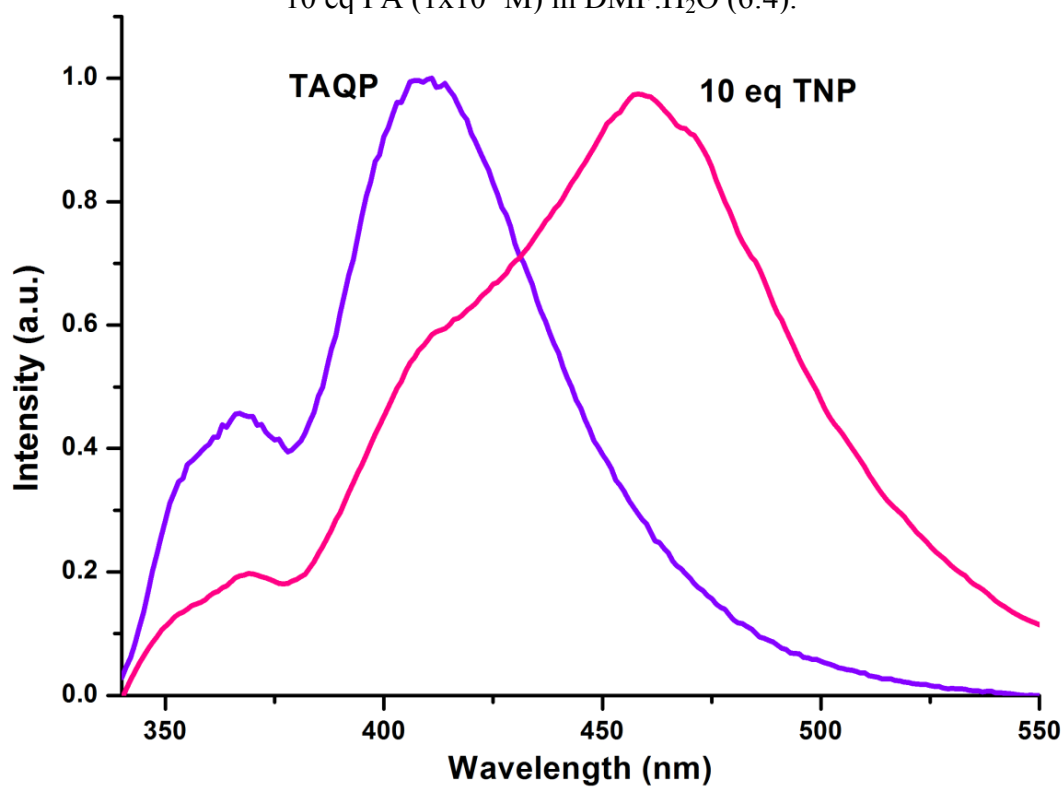

**Fig. S19:** Emission spectra of TAQP ( $1 \times 10^{-5} \text{M}$ ) before (purple) and after (red) the addition of 10 eq PA ( $1 \times 10^{-3} \text{M}$ ) in MeOH:H<sub>2</sub>O (6:4).

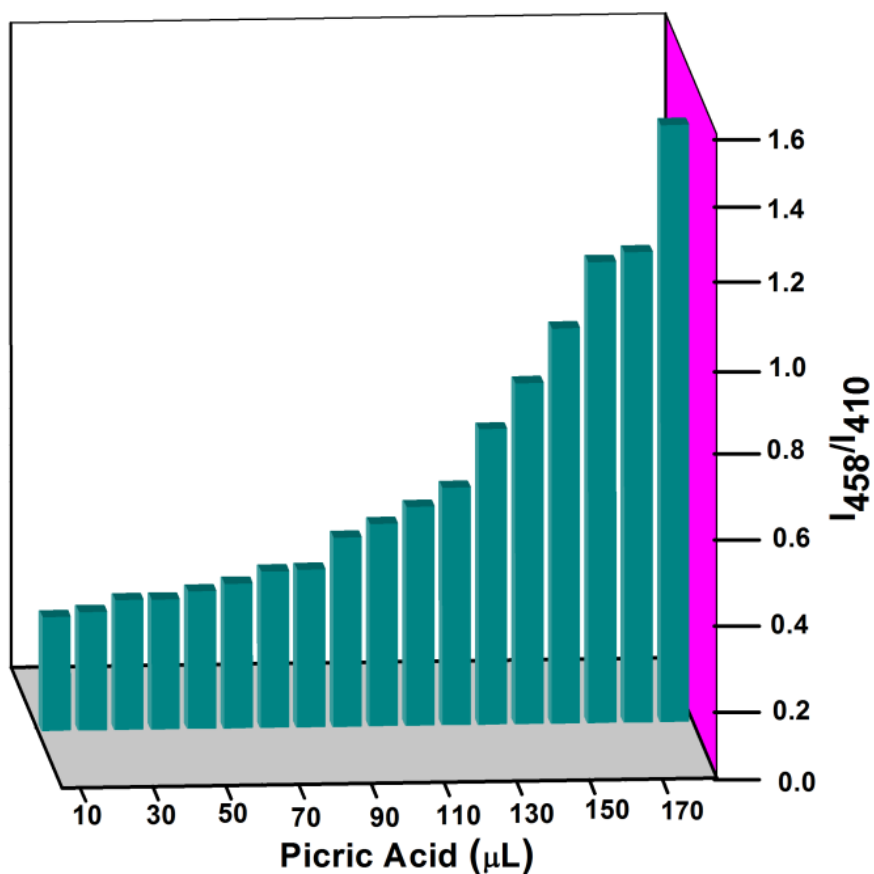

**Fig. S20:** Relative changes of fluorescent intensity ( $I_{458}/I_{410}$ ) of TAQP ( $1 \times 10^{-5} \text{M}$ ) for PA in MeOH/H<sub>2</sub>O or DMF/H<sub>2</sub>O.

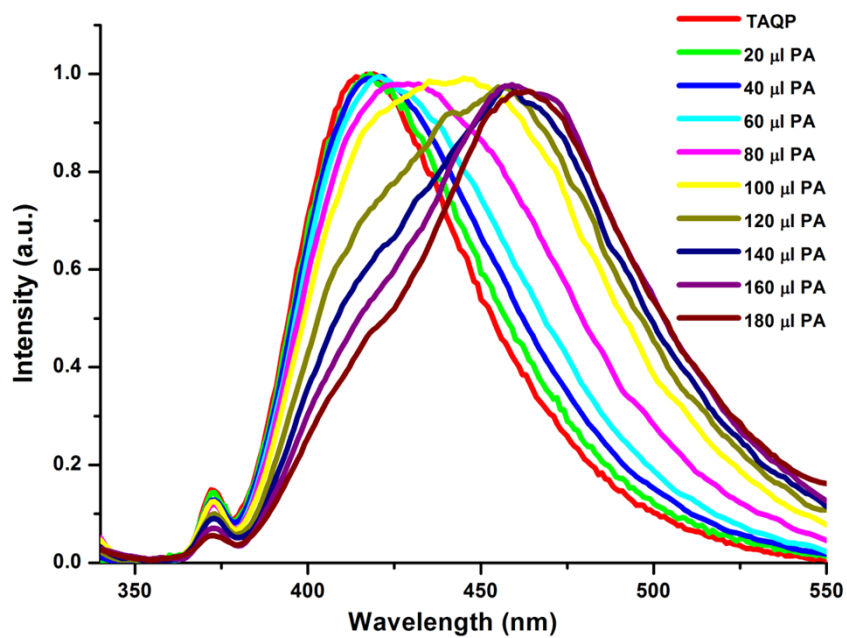

**Fig. S21:** Emission spectral titration of TAQP ( $1 \times 10^{-5} \text{M}$ ) with PA ( $1 \times 10^{-3} \text{M}$ ) in H<sub>2</sub>O.

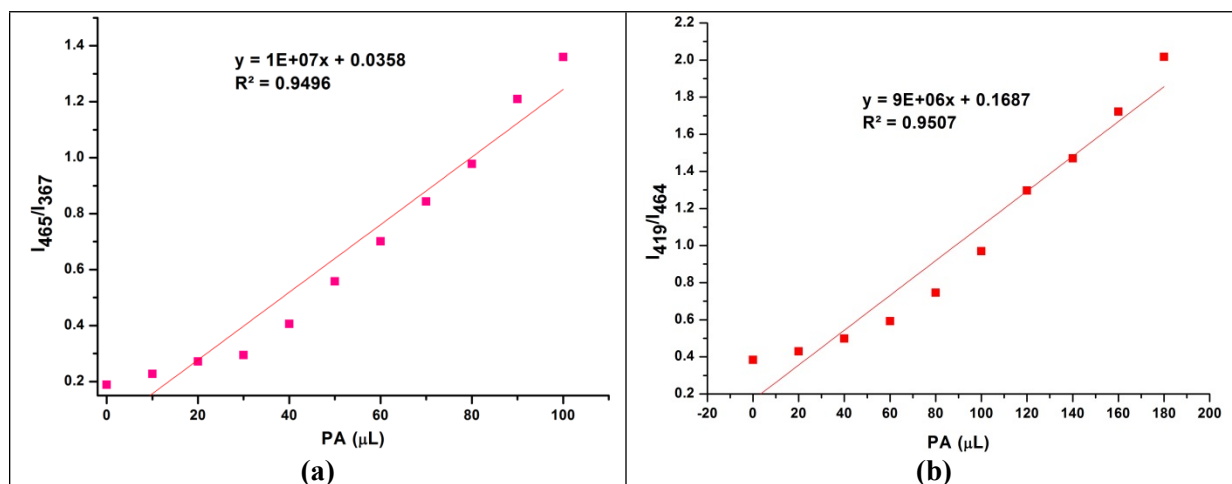

**Fig. S22:** Plot of luminescence ratios of TAQP ( $1 \times 10^{-5} \text{M}$ ) vs the concentration of PA in (a) DMF/ $\text{H}_2\text{O}$  mixture and (b) neat  $\text{H}_2\text{O}$  suspension. The slope of the fitted line is used for calculating the PA detection limit of TAQP.

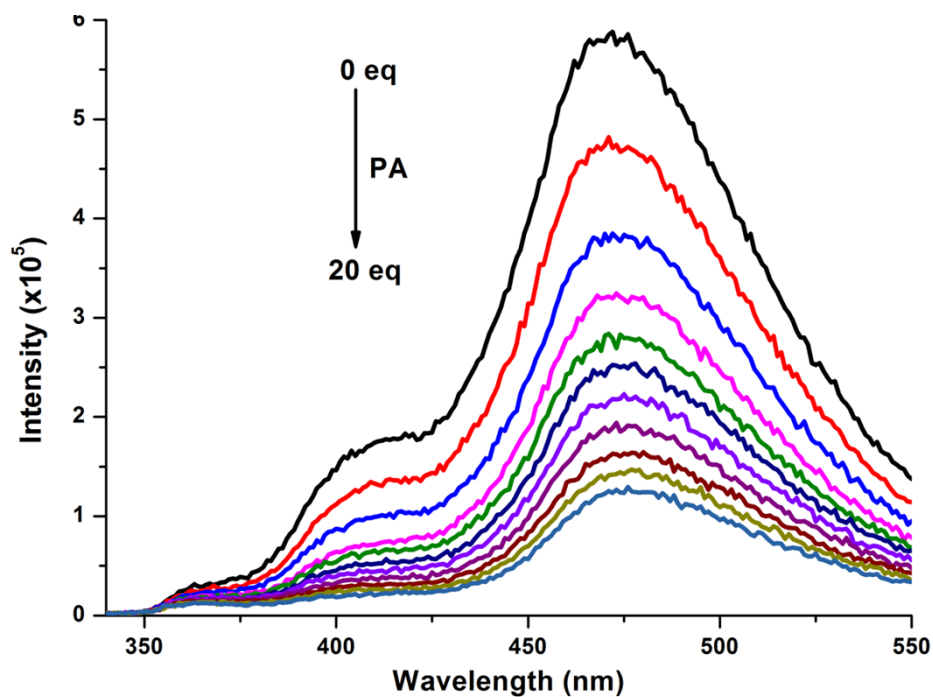

**Fig. S23:** Emission spectral titration of TAQP ( $1 \times 10^{-3} \text{M}$ ) with 20 equivalent of PA ( $1 \times 10^{-3} \text{M}$ ) in DMF.

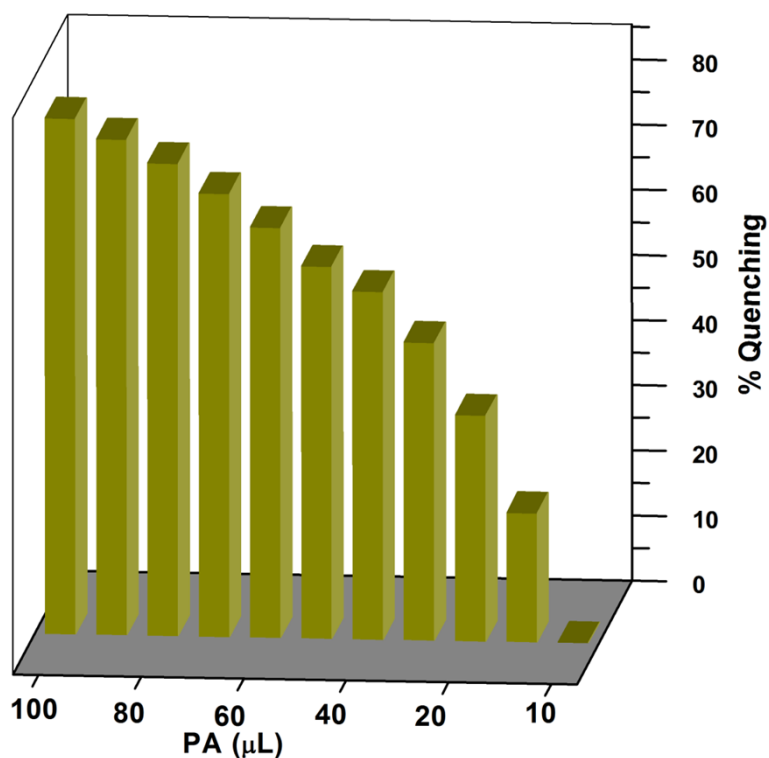

**Fig. S24:** Luminescence quenching plot of TAQP ( $1 \times 10^{-3}\text{M}$ ) with 20 equivalent of PA ( $1 \times 10^{-3}\text{M}$ ) in DMF

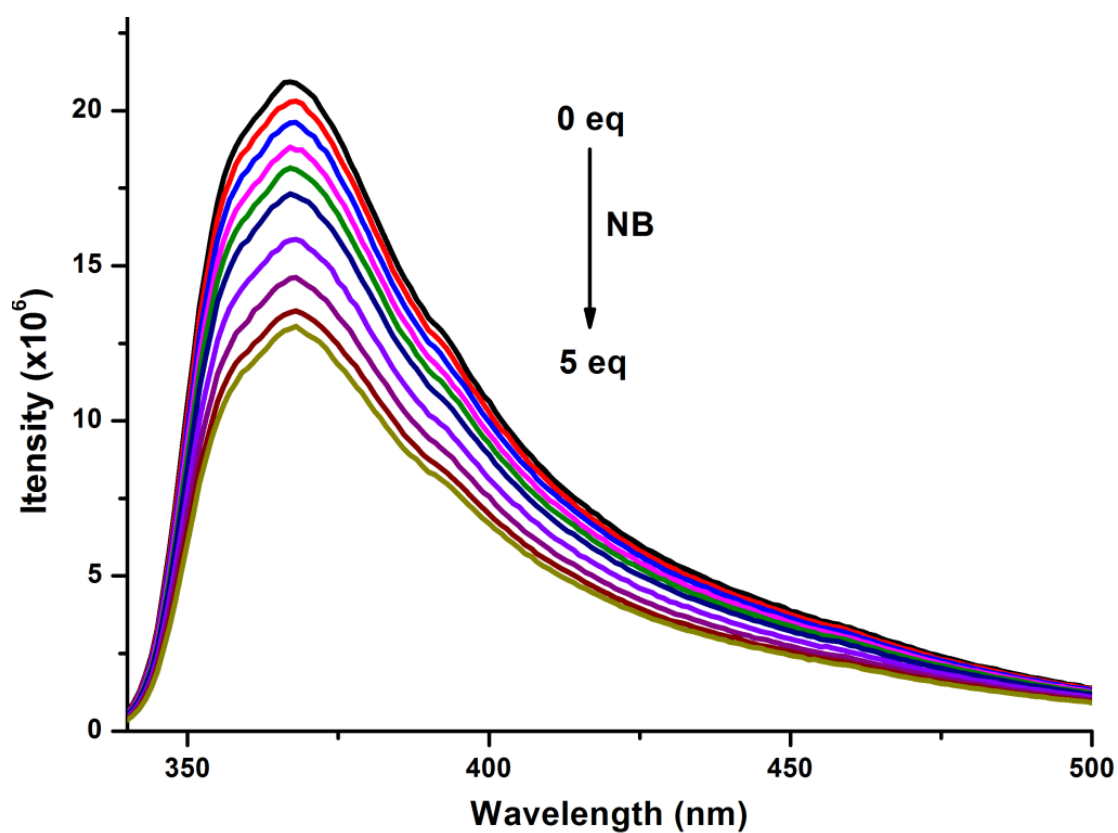

**Fig. S25:** Emission spectral titration of TAQP ( $1 \times 10^{-5}\text{M}$ ) with 5 equivalent of NB ( $1 \times 10^{-3}\text{M}$ ) in DMF

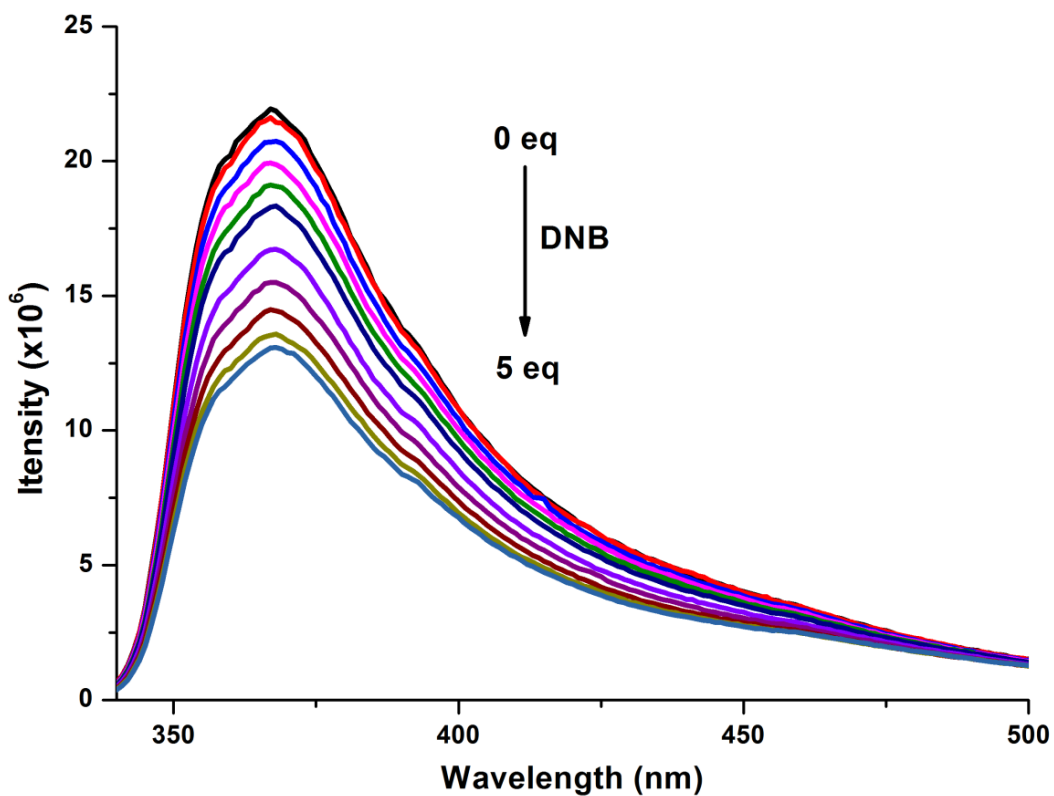

Fig. S26: Emission spectral titration of TAQP (1x10<sup>-5</sup>M) with 5 equivalent of DNB (1x10<sup>-3</sup>M) in DMF

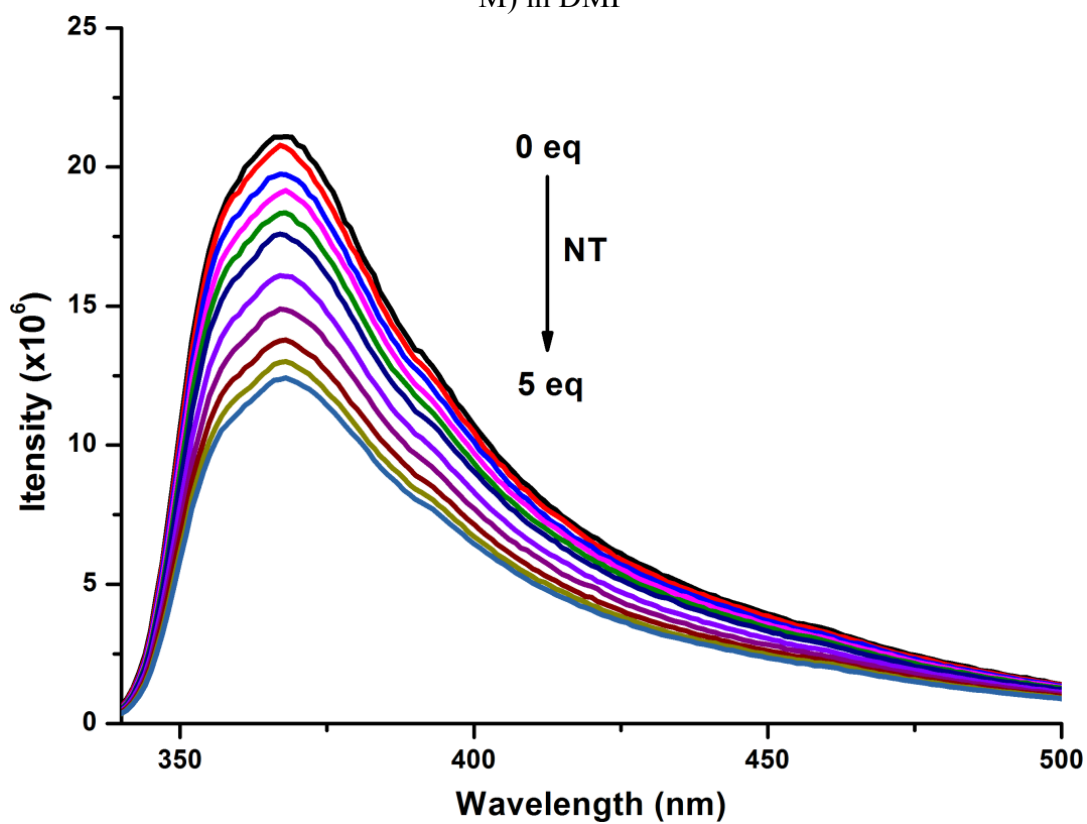

Fig. S27: Emission spectral titration of TAQP (1x10<sup>-5</sup>M) with 5 equivalent of NT (1x10<sup>-3</sup>M) in DMF.



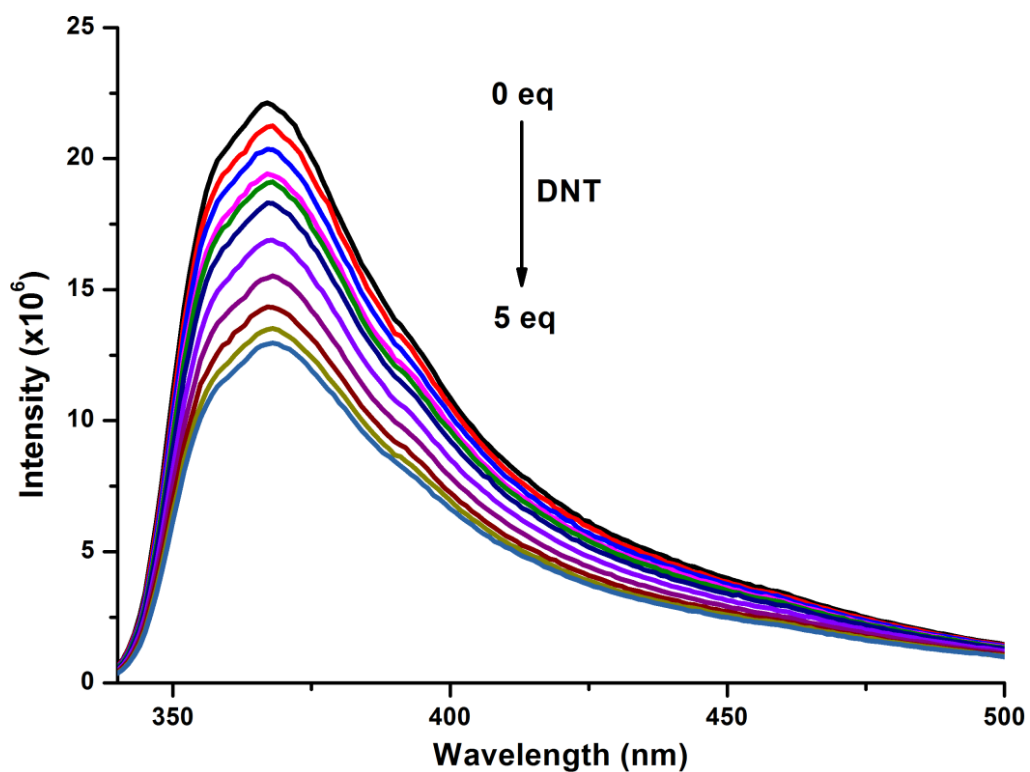

**Fig. S28:** Emission spectral titration of TAQP ( $10^{-5}$  M) with 5 equivalent of DNT ( $10^{-3}$  M) in DMF.

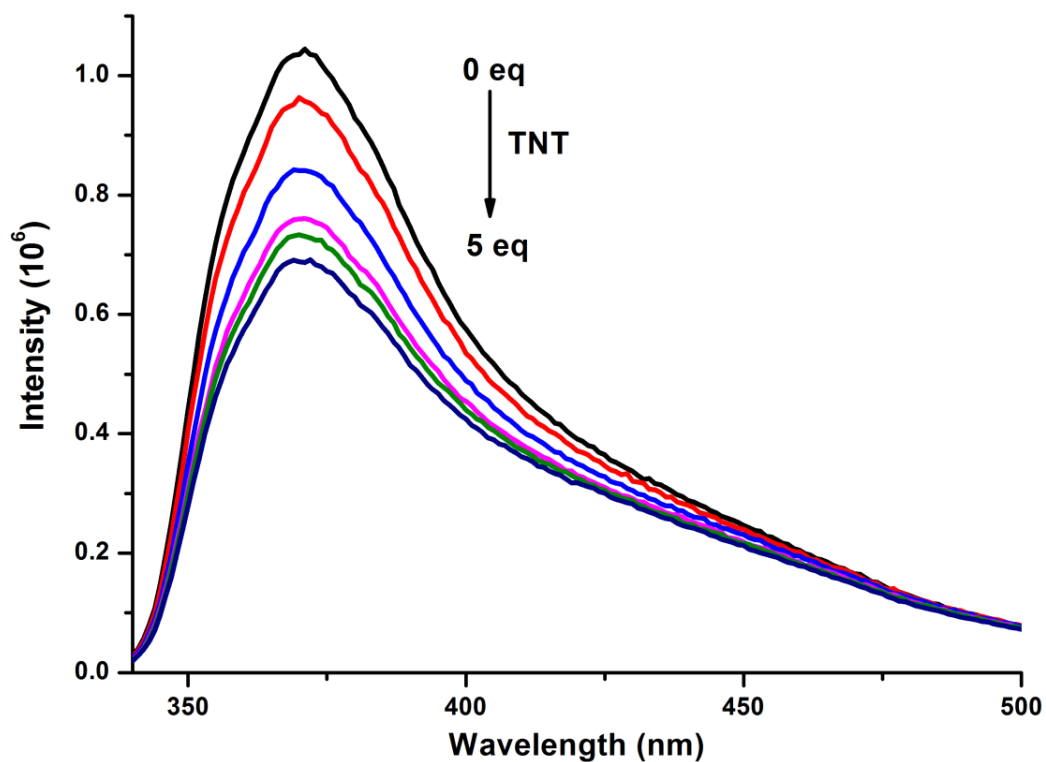

**Fig. S29:** Emission spectral titration of TAQP ( $1 \times 10^{-5}$  M) with 5 equivalent of TNT ( $1 \times 10^{-3}$  M) in DMF.

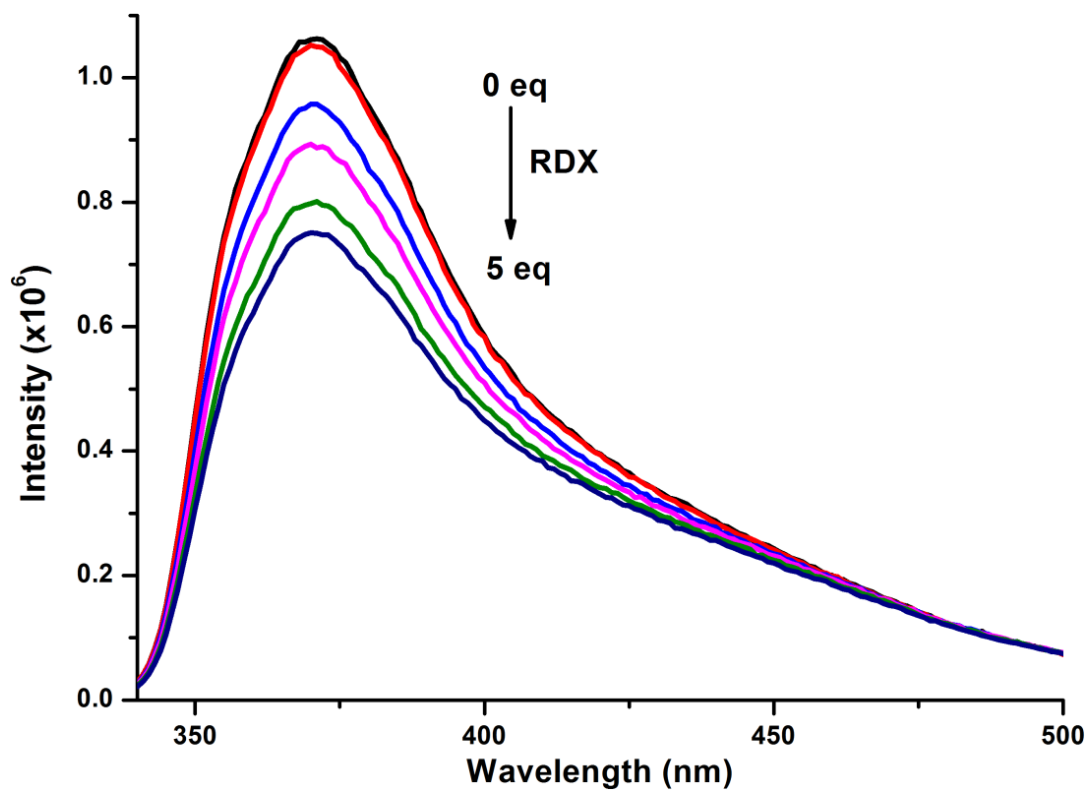

Fig. S30: Spectra of TAQP ( $1 \times 10^{-5} \text{M}$ ) with 5 equivalent of RDX ( $1 \times 10^{-3} \text{M}$ ) in DMF.

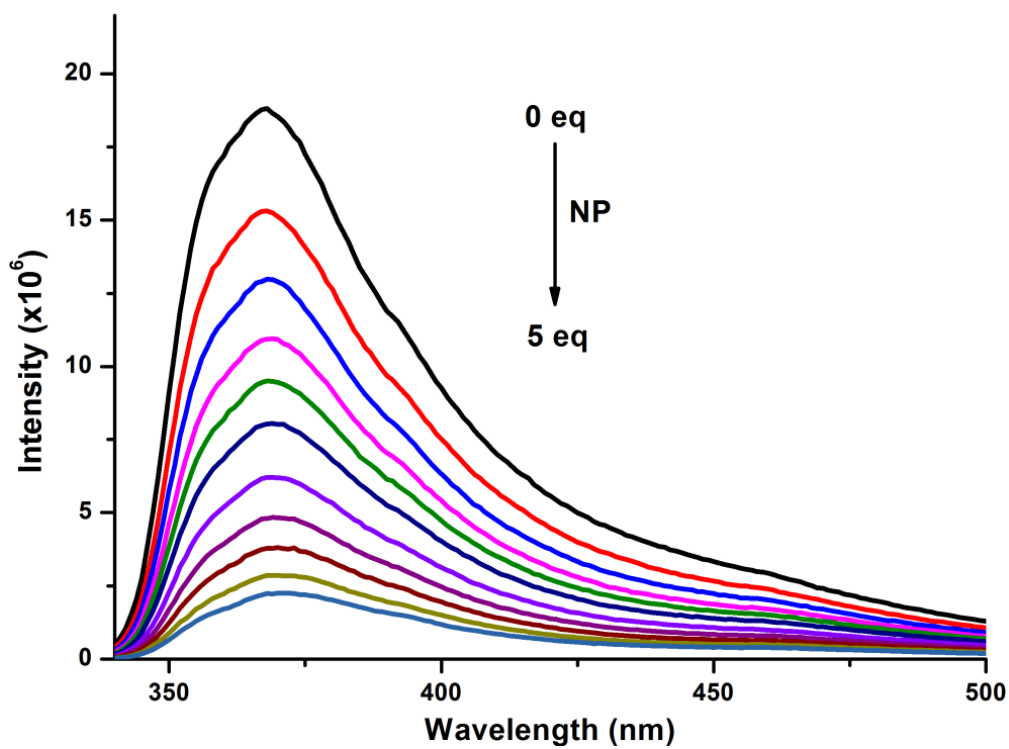

Fig. S31: Emission spectral titration of TAQP ( $1 \times 10^{-5} \text{M}$ ) with 5 equivalent of NP ( $1 \times 10^{-3} \text{M}$ ) in DMF.

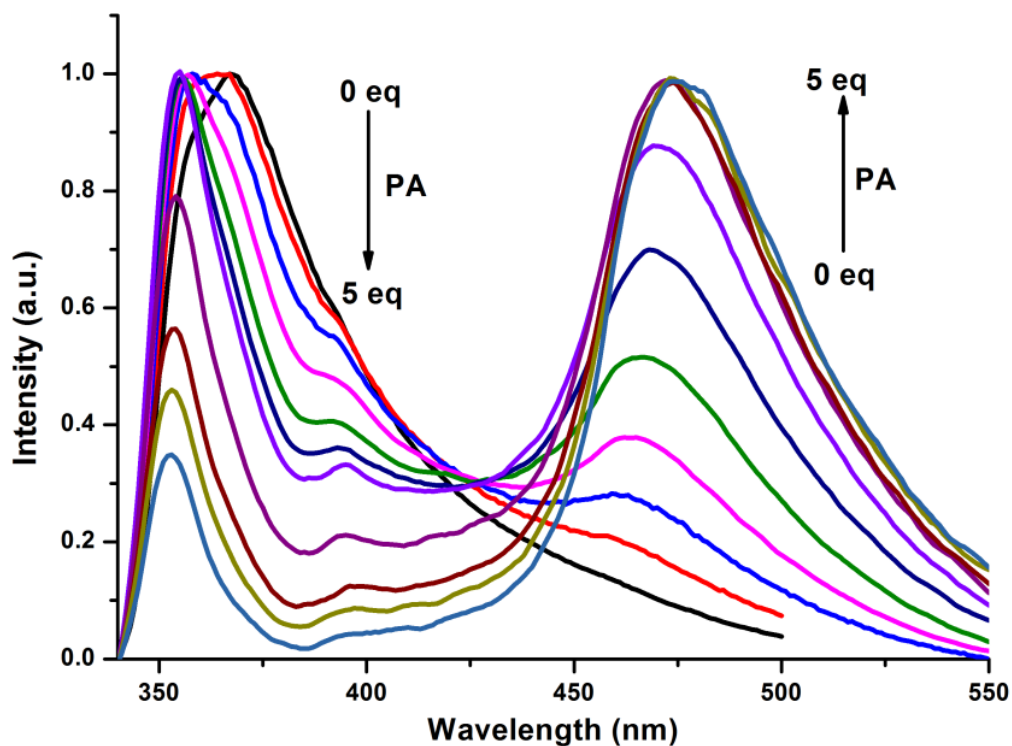

Fig. S32: Emission spectral titration of TAQP ( $1 \times 10^{-5} \text{M}$ ) with 5 equivalent of PA ( $1 \times 10^{-3} \text{M}$ ) in DMF.

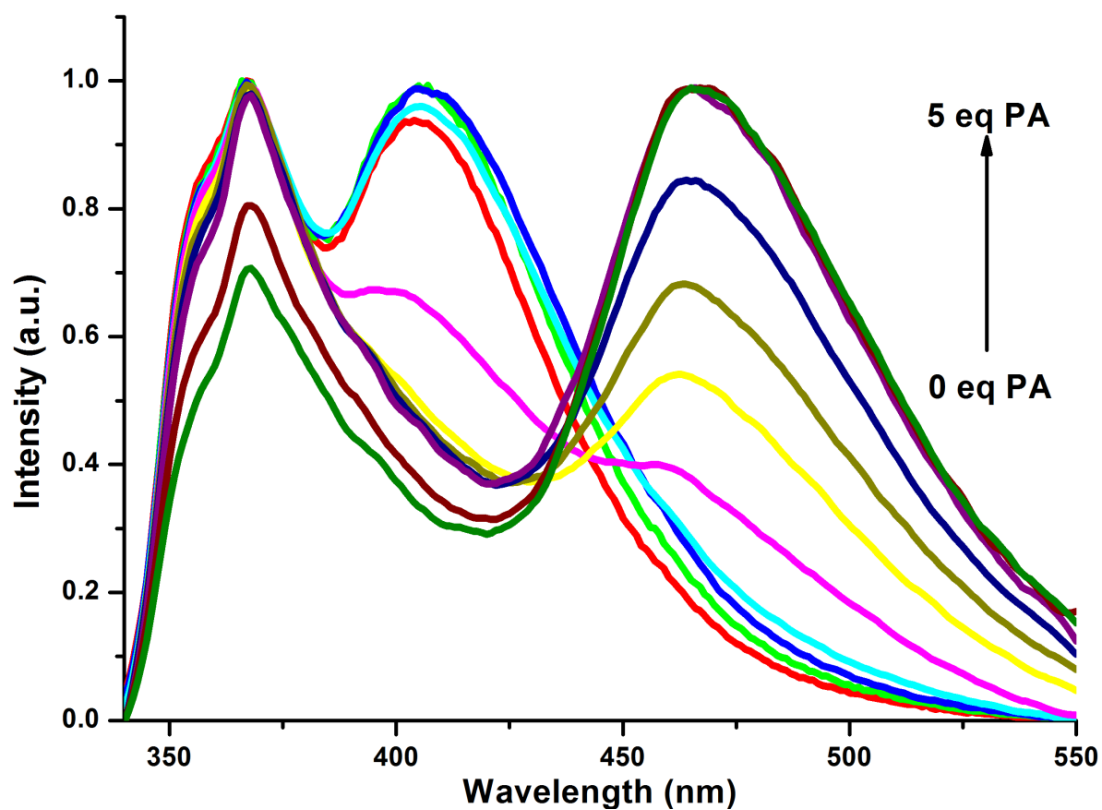

Fig. S33: Emission spectral titration of TAQP ( $1 \times 10^{-5} \text{M}$ ) with 5 equivalent of PA ( $1 \times 10^{-3} \text{M}$ ) in MeOH.

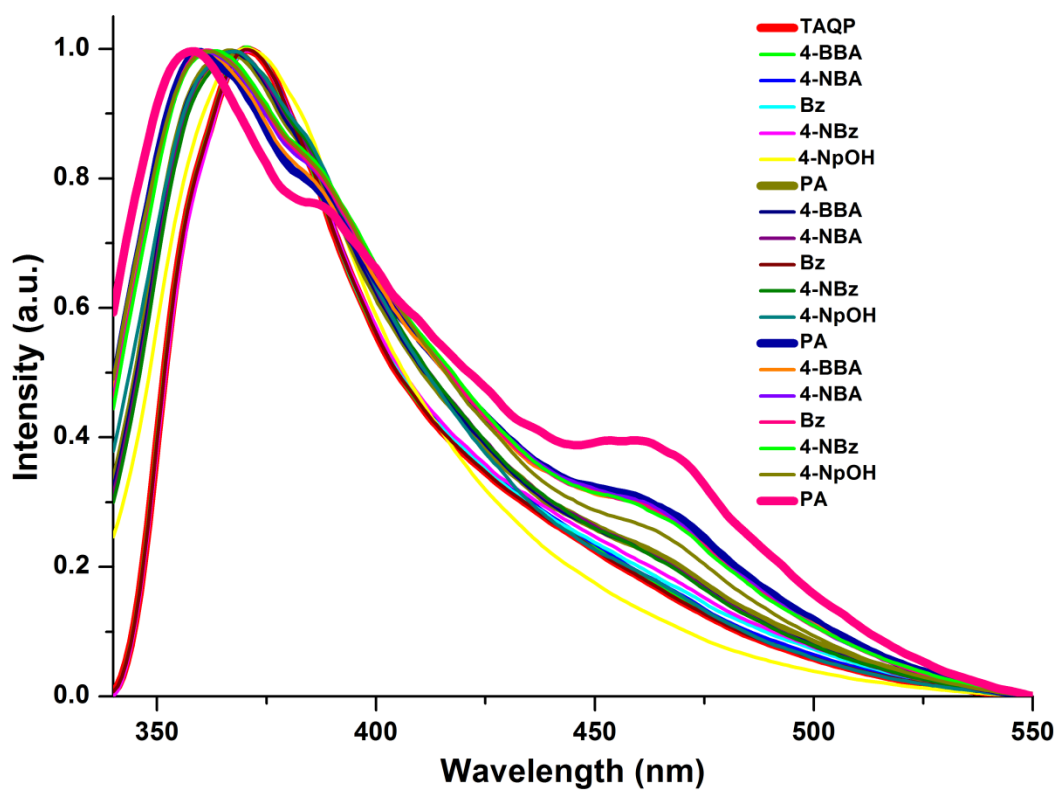

**Fig. S34:** Emission spectral titration of TAQP ( $1 \times 10^{-5} \text{M}$ ) of PA ( $1 \times 10^{-3} \text{M}$ ) in the presence of other interfering aromatic analytes ( $1 \times 10^{-3} \text{M}$ ) in DMF in incremental addition of  $50 \mu\text{L}$  each. These observations suggest that the formation of the peak at  $465 \text{ nm}$  is observed only in case of PA.
